1  
2  
3  
4  
5  
6  
7  
8  
9  
10  
11  
12  
13  
14  
15  
16  
17  
18  
19  
20

**Zinc Import Mediated by AdcABC is Critical for  
Colonization of the Dental Biofilm by *Streptococcus  
mutans* in an Animal Model**

**Tridib Ganguly, Alexandra M. Peterson, Jessica K. Kajfasz,  
Jacqueline Abranches and José A. Lemos\***

**Department of Oral Biology, College of Dentistry, University  
of Florida, Gainesville, Florida, USA**

**Running title:** Zinc transport of *S. mutans*

**Key words:** *Streptococcus mutans*, dental caries, zinc, metal homeostasis, nutritional immunity

\* Correspondence:

Department of Oral Biology, University of Florida College of Dentistry

PO Box 100424, Gainesville, Florida, 32608

Phone: (352) 273-8843

Email: [jlemos@dental.ufl.edu](mailto:jlemos@dental.ufl.edu)

## 21 **Summary**

22 Trace metals are essential to all domains of life but toxic when found at high concentrations.  
23 While the importance of iron in host-pathogen interactions is firmly established, contemporary  
24 studies indicate that other trace metals, including manganese and zinc, are also critical to the  
25 infectious process. In this study, we sought to identify and characterize the zinc uptake  
26 system(s) of *S. mutans*, a keystone pathogen in dental caries and a causative agent of bacterial  
27 endocarditis. Different than other pathogenic bacteria, including several streptococci, that  
28 encode multiple zinc import systems, bioinformatic analysis indicated that the *S. mutans* core  
29 genome encodes a single, highly conserved, zinc importer commonly known as AdcABC.  
30 Inactivation of the genes coding for the metal-binding AdcA ( $\Delta adcA$ ) or both AdcC ATPase and  
31 AdcB permease ( $\Delta adcCB$ ) severely impaired the ability of *S. mutans* to grow under zinc-  
32 depleted conditions. Intracellular metal quantifications revealed that both mutants accumulated  
33 less zinc when grown in the presence of a sub-inhibitory concentration of a zinc-specific  
34 chelator. Notably, the  $\Delta adcCB$  strain displayed a severe colonization defect in a rat oral infection  
35 model. Both  $\Delta adc$  strains were hypersensitive to high concentrations of manganese, showed  
36 reduced peroxide tolerance, and formed less biofilm in sucrose-containing media when  
37 cultivated in the presence of the lowest amount of zinc that support their growth, but not when  
38 zinc was supplied in excess. Collectively, this study identifies AdcABC as the lone high affinity  
39 zinc importer of *S. mutans* and provides preliminary evidence that zinc is a growth-limiting factor  
40 within the dental biofilm.

41

## 42 Introduction

43 The first-row *d*-block elements iron, manganese and zinc are essential to all forms of life by  
44 serving structural, catalytic and regulatory functions to numerous biological processes.  
45 However, when in excess, these biometals are toxic such that their cellular flux and allocation  
46 must be tightly regulated. This Goldilocks paradox creates an opportunity for vertebrate hosts to  
47 deploy either metal sequestration or metal intoxication strategies to combat microbial infection;  
48 an active process known as nutritional immunity (Kehl-Fie & Skaar, 2010). Nutritional immunity  
49 strategies include mobilization of metal-chelating proteins to infected tissues such as iron-  
50 sequestering transferrin and lactoferrin, and neutrophil-secreted calprotectin which is  
51 responsible for restricting manganese, zinc and, in certain environments, iron availability  
52 (Nakashige, Zhang, Krebs, & Nolan, 2015; Zackular, Chazin, & Skaar, 2015). Paradoxically, the  
53 host can increase cytosolic zinc or mobilize copper or zinc into the phagosolysosome creating a  
54 toxic environment for intracellular bacteria (Sheldon & Skaar, 2019). To overcome metal  
55 limitation during infection, bacteria rely on the expression of surface-associated metal importers  
56 with some organisms also secreting small metal-binding molecules (metallophores) that tightly  
57 bind trace metals that are then reinternalized via specific transporters (Palmer & Skaar, 2016).  
58 Importantly, *in vivo* studies have shown that metal import systems are critical to bacterial  
59 virulence (Fischer et al., 2016; Garcia, Brumbaugh, & Mobley, 2011; Koh et al., 2015;  
60 Mastropasqua et al., 2017; Ong, Berking, Walker, & McEwan, 2018).

61 While the central role of iron in host-pathogen interactions has been known for decades,  
62 the importance of manganese and zinc homeostasis to bacterial pathogenesis is a relatively  
63 newer development (Kehl-Fie & Skaar, 2010; Lonergan & Skaar, 2019). In bacteria, manganese  
64 is the co-factor of enzymes involved in DNA replication, central metabolism and critical to  
65 activation of oxidative stress responses of gram-positive bacteria (Juttukonda & Skaar, 2015).  
66 Zinc is the second most abundant metal co-factor and is incorporated into 5-6% of all bacterial  
67 proteins, including central metabolism enzymes, regulatory proteins and metalloproteases

68 (Lonergan & Skaar, 2019; Rahman & Karim, 2018). In addition, zinc plays an additional role in  
69 host-pathogen interactions by stimulating innate and adaptive immune cell function and, as  
70 indicated above, through mobilization within phagosomes to intoxicate invading pathogens  
71 (Lonergan & Skaar, 2019; Sheldon & Skaar, 2019; Subramanian Vignesh & Deepe, 2016).  
72 Different than iron and manganese, zinc does not undergo redox-cycling, but can form tighter  
73 and stabler interactions with metal ligands. As a result, zinc can occupy metal-binding residues  
74 of non-cognate metalloproteins inhibiting or reducing their activities; a process known as protein  
75 mismetallation (Chandrangsu & Helmann, 2016; Imlay, 2014).

76 A resident of dental plaque, *Streptococcus mutans* is a keystone pathogen in dental  
77 caries due to its ability to modify the oral biofilm architecture and environment in a way that  
78 facilitates the proliferation of acidogenic and aciduric bacteria at the expense of health-  
79 associated bacteria (Bowen, Burne, Wu, & Koo, 2018; Lemos et al., 2019). In addition to dental  
80 caries, *S. mutans* is a causative agent of infective endocarditis, a life-threatening infection of the  
81 endocardium (Pant et al., 2015). Once established in the oral biofilm, *S. mutans* metabolizes  
82 dietary carbohydrates, in particular sucrose, to produce an acidic biofilm matrix that is conducive  
83 to the growth of other cariogenic organisms (Lemos et al., 2019). Despite the importance of  
84 manganese and zinc to bacterial physiology, the mechanisms utilized by oral bacteria to  
85 maintain manganese and zinc homeostasis and their significance to polymicrobial and host-  
86 pathogen interactions in the oral cavity are poorly understood. Recently, we characterized the  
87 major manganese transporters of *S. mutans* and showed that maintenance of manganese  
88 homeostasis is critical for the expression of major virulence attributes of *S. mutans*, including  
89 the ability to tolerate acid and oxidative stresses and to form biofilms in a sucrose-dependent  
90 manner (Kajfasz et al., 2020). In this study, we sought to identify and characterize the zinc  
91 uptake system(s) of *S. mutans* and then determine the significance of zinc acquisition to the  
92 pathophysiology of *S. mutans*.

93

## 94 **Results**

### 95 *AdcABC is the main transporter responsible for zinc uptake in S. mutans*

96 In other streptococci, zinc acquisition is mediated by an ABC-type transporter known as  
97 AdcABC whereby AdcA is the zinc-binding lipoprotein, AdcB a membrane permease and AdcC  
98 a cytoplasmic ATPase (Bayle et al., 2011; Burcham et al., 2020; Loo, Mitrakul, Voss, Hughes, &  
99 Ganeshkumar, 2003; Ong et al., 2018). The *adcABC* genes are regulated by *adcR*, a  
100 metalloregulator from the MarR family, which is located immediately upstream and, depending  
101 on the streptococcal species, co-transcribed with *adcCBA* or *adcCB* (Fig. 1) (Reyes-Caballero  
102 et al., 2010). Through BLAST search analysis, we identified homologues of the *adcR*, *adcA*,  
103 *adcB* and *adcC* genes in the core genome of *S. mutans*. Similar to *S. agalactiae* and *S.*  
104 *pyogenes*, the gene coding for the zinc-binding AdcA lipoprotein is not co-localized with *adcR*,  
105 *adcB* and *adcC* being located as a monocistronic transcriptional unit elsewhere in the  
106 chromosome (Fig. 1). In addition, while the majority of streptococcal genomes encode two  
107 copies of *adcA*, dubbed *adcA* and *adcAll* (Bayle et al., 2011; Bersch et al., 2013; Brown et al.,  
108 2016; Burcham et al., 2020; Loisel et al., 2011; Loisel et al., 2008; Moulin et al., 2016), the  
109 genome of *S. mutans* encodes a single *adcA* gene copy, which is similar in size and more  
110 closely-related to the *adcA* gene genetically-linked to *adcBC* than to *adcAll* (Fig. 1). In most  
111 cases, the streptococcal *adcAll* is genetically coupled to metal-binding poly-histidine triad (*pht*)  
112 genes, which encode proteins that are thought to scavenge zinc outside the cell shuttling it to  
113 either AdcAll and, possibly, AdcA for internalization (Bersch et al., 2013; Loisel et al., 2011;  
114 Loisel et al., 2008; Zheng et al., 2011). While most streptococci encode at least one *pht* gene  
115 copy, bioinformatic analysis indicate that the core *S. mutans* genome lacks *pht* homologs.  
116 Similar to other streptococcal AdcA, the *S. mutans* AdcA has two zinc-binding domains that are  
117 characteristic of the genus: an N-terminal tertiary scaffold consisting of 3 histidine and 1  
118 glutamic acid residue (H71, H149, H212, and E298) and a C-terminal ZinT domain consisting of  
119 three histidine residues (H461, H470 and H472) (Fig. 2 and S1). In addition, there are three

120 additional conserved histidine residues (H71, H149 and H213) that aid in metal recruitment by  
121 AdcA (Cao et al., 2018).

122 To evaluate the significance of zinc acquisition to the pathophysiology of *S. mutans*, we  
123 generated strains lacking *adcA* ( $\Delta adcA$ ) or both *adcC* and *adcB* ( $\Delta adcBC$ ) in the parent strain  
124 UA159 and then tested their ability to grow under zinc-replete or zinc-depleted conditions. Both  
125  $\Delta adcA$  and  $\Delta adcBC$  strains showed minimal growth in the chemically-defined FMC medium  
126 (Terleckyj, Willett, & Shockman, 1975) (Fig. 3A), which does not contain a source of zinc in its  
127 original recipe (<1  $\mu$ M zinc, (Kajfasz et al., 2020). However, supplementation of the FMC  
128 medium with as little as 5  $\mu$ M of ZnSO<sub>4</sub> restored growth of both *adc* mutants (Fig. 3B). Next, we  
129 tested the ability of parent and mutant strains to grow in brain heart infusion (BHI), a complex  
130 media containing ~10  $\mu$ M zinc (Kajfasz et al., 2020) that is routinely used to cultivate *S. mutans*  
131 in our laboratory. Based on the behavior of the mutant strains in zinc-supplemented FMC, it was  
132 not surprising that both the  $\Delta adcA$  and  $\Delta adcBC$  strains grew well in BHI (Fig. 3C). Next, we  
133 tested the ability of the  $\Delta adcA$  and  $\Delta adcCB$  strains to grow in BHI containing purified human  
134 calprotectin or in BHI containing the zinc-specific chelator N,N,N',N'-Tetrakis(2-pyridylmethyl)  
135 ethylenediamine (TPEN) (Zhang et al., 2017). In agreement with the role of calprotectin and  
136 TPEN in zinc-sequestration, growth of  $\Delta adcA$  and  $\Delta adcCB$  was inhibited by calprotectin (Fig.  
137 2D), or TPEN (Fig. 2E). Finally, the growth defect of the  $\Delta adcCB$  strain under all zinc-depleted  
138 conditions were restored in the genetically-complemented  $\Delta adcCB^{\text{comp}}$  strain (Fig. 2).

139 While AdcAll and Pht-encoding genes are absent in *S. mutans*, a gene (*smu2069*) coding  
140 for a hypothetical protein with 37% identity and 60% similarity to the *E.coli* ZupT, a member of  
141 the zinc import ZIP family commonly found in gram-negative and in selected gram-positive  
142 bacteria (Grass, Wong, Rosen, Smith, & Rensing, 2002; Zackular et al., 2020) was identified  
143 through BLAST searches. To probe the possible role of Smu2069 in zinc uptake, we created a  
144 strain bearing a *smu2069* deletion in UA159 ( $\Delta smu2069$ ) and in the  $\Delta adcCB$  background

145 thereby generating a  $\Delta adcCB\Delta smu2069$  triple mutant. Inactivation of *smu2069*, alone or in  
146 combination with *adcCB*, did not affect zinc uptake as the  $\Delta smu2069$  strain was fully capable to  
147 grow in FMC without zinc supplementation and the triple mutant phenocopied the  $\Delta adcCB$  strain  
148 (Fig. S2).

149 Next, we used inductively coupled plasma mass spectrometry (ICP-MS) to determine the  
150 intracellular concentration of selected metals (copper, iron, manganese and zinc) in the parent  
151 UA159 and derivative strains grown to mid logarithmic phase in BHI or in BHI containing 6  $\mu$ M  
152 TPEN, a concentration permissible to the growth of the  $\Delta adcCB$  and  $\Delta adcA$  strains (data not  
153 shown). As compared to UA159, both  $\Delta adcCB$  and  $\Delta adcA$  mutants showed a relatively small,  
154 yet significant, reduction in intracellular zinc when grown in plain BHI (Fig. 4A). However, the  
155 addition of TPEN to the growth media further increased this difference with both  $\Delta adcCB$  and  
156  $\Delta adcA$  strains showing ~3-fold reduction in intracellular zinc when compared to the parent strain  
157 (Fig. 4B). The addition of 6  $\mu$ M TPEN to the growth media did not affect growth nor the  
158 intracellular zinc content of the parent strain confirming that AdcABC alone can maintain  
159 intracellular zinc homeostasis under zinc-restricted conditions. Finally, intracellular copper and  
160 iron concentrations were not markedly different in parent and mutant strains (data not shown),  
161 but there were significant increases in intracellular manganese in  $\Delta adcCB$  (~30% in BHI and  
162 ~20% in BHI+TPEN) with the  $\Delta adcA$  strain showing a similar trend in BHI+TPEN (Fig. 4C-D).  
163 Collectively, these results indicate that growth of *S. mutans* in zinc-restricted environments is  
164 primarily mediated by AdcABC.

165

#### 166 *The $\Delta adcCB$ mutant is hypersensitive to high manganese concentrations*

167 The ICP-MS quantifications indicate that zinc:manganese ratio is drastically different in the  
168  $\Delta adc$  strains when compared to the parent strain, particularly under TPEN-mediated zinc  
169 restriction. While zinc:manganese ratios of UA159 and  $\Delta adc$  strains grown in plain BHI was

170 about 1:1 (1:0.7 for UA159 and ~1:1 for  $\Delta adcA \Delta adcCB$ ), there was ~3 times more manganese  
171 than zinc (1:3 ratio) in the  $\Delta adc$  strains when grown in BHI+TPEN and a well-balanced 1:1 ratio  
172 for UA159. Interestingly, a notable increase in intracellular manganese was also observed in a  
173 *S. pneumoniae* double  $\Delta adcA \Delta adcAll$  strain which, as expected, has a major defect in zinc  
174 uptake (Bayle et al., 2011). While manganese is an essential micronutrient to bacteria and lactic  
175 acid bacteria are notorious for having a high demand for manganese (Archibald, 1986), recent  
176 studies revealed that strains of *S. pneumoniae*, *S. mutans* and *Enterococcus faecalis* lacking  
177 the manganese exporter MntE can be intoxicated by manganese (Lam, Wong, Chong, & Kline,  
178 2020; Martin, Lisher, Winkler, & Giedroc, 2017; O'Brien, Pastora, Stoner, & Spatafora, 2020).  
179 Using a plate titration assay, we showed that the  $\Delta adcCB$  strain was hypersensitive to high  
180 concentrations of manganese (Fig. 5). This hypersensitivity was fully rescued by addition of 20  
181  $\mu\text{M}$   $\text{ZnSO}_4$  to the growth media directly linking manganese toxicity to a disruption of  
182 zinc:manganese balance.

183

184 *The  $\Delta adcCB$  strain showed an impaired ability to colonize the rat tooth surface*

185 To determine the significance of zinc transport in oral infection by *S. mutans*, we utilized a  
186 rat oral colonization model to test the capacity of the  $\Delta adcCB$  strain to colonize the teeth of rats  
187 fed a metal balanced diet (~1.25 nM  $\text{ZnCO}_3$ ) containing 12% sucrose to facilitate the  
188 establishment of *S. mutans* in dental plaque. As compared to the parent strain, the  $\Delta adcCB$   
189 strain was recovered in significantly fewer numbers (~2 logs) two weeks after the first day of  
190 infection, with no colonies recovered in two of the eight infected animals (Fig. 6A). Moreover,  
191 while *S. mutans*-like colonies accounted for 40 to 60% of the total flora recovered from animals  
192 infected with the parent strain, less than 1% of the recovered flora of animals infected with the  
193  $\Delta adcCB$  strain corresponded to *S. mutans*-like colonies (Fig. 6B). All in all, this result indicates  
194 that zinc is a growth-limiting factor within the oral biofilm and that the ability to scavenge



195 environmental zinc via the AdcABC transporter is critical to the cariogenic potential of *S.*  
196 *mutans*.

197

198 *Expression of two virulence-related traits were impaired in the  $\Delta$ adcA and  $\Delta$ adcCB strains*

199 The ability to cope with environmental stresses, particularly low pH and oxidative stress,  
200 and to form robust biofilms in the presence of sucrose are key virulence traits of *S. mutans*  
201 (Bowen et al., 2018; Lemos et al., 2019). To investigate whether the oral colonization defect of  
202 the  $\Delta$ adcCB strain could be linked to poor expression one or more of these virulence attributes,  
203 we first assessed the ability of  $\Delta$ adcA and  $\Delta$ adcCB to tolerate acid or H<sub>2</sub>O<sub>2</sub> stresses using both  
204 growth curve and disc diffusion assays. While the two mutants grew as well as the UA159  
205 parent strain at low pH conditions (data now shown), both showed larger growth inhibition zones  
206 when exposed to H<sub>2</sub>O<sub>2</sub> in a disc diffusion assay (data not shown) and longer lag phase and  
207 slightly slower growth rates when grown in FMC supplemented with 5  $\mu$ M ZnSO<sub>4</sub>, the minimal  
208 amount of zinc needed to support growth of the  $\Delta$ adc strains, in the presence of a sub-inhibitory  
209 concentration of H<sub>2</sub>O<sub>2</sub> (Fig. 7A). Notably, increasing the final concentration of ZnSO<sub>4</sub> from 5 to  
210 20  $\mu$ M abolished the increased H<sub>2</sub>O<sub>2</sub> sensitivity of both mutants (Fig. 7B). Next, we tested the  
211 ability of the mutants to form biofilm on saliva-coated microtiter plate wells using 1% sucrose as  
212 the sugar source. After 24 hours of incubation, both  $\Delta$ adcBC and  $\Delta$ adcA showed a small but  
213 significant defect in biofilm formation when grown in FMC containing 5  $\mu$ M ZnSO<sub>4</sub> but not 20  $\mu$ M  
214 ZnSO<sub>4</sub> (Fig. 7C). Collectively, these results serve to further support the oral colonization defect  
215 of the  $\Delta$ adcBC strain in the murine model.

216

## 217 Discussion

218 Despite the critical importance of metals to bacterial virulence, little is known about the  
219 mechanisms of metal homeostasis in oral bacteria. In this report, we identified and  
220 characterized a high-affinity zinc transporter of *S. mutans*. Inactivation of *adcA* or *adcCB*  
221 rendered *S. mutans* unable to grow in the presence of zinc chelators, including calprotectin  
222 which can bind zinc in the picomolar range and is produced by host immune cells, specially  
223 neutrophils (Brophy, Hayden, & Nolan, 2012; Nakashige et al., 2015; Zackular et al., 2015).  
224 Different than other streptococci, the genome of *S. mutans* lacks a second copy of *adcA* or of  
225 polyhistidine triad (*pht*) genes. More recently, zinc uptake machineries that resemble  
226 siderophore-mediated iron uptake systems were identified in several bacteria including  
227 *Staphylococcus aureus* and *Pseudomonas aeruginosa* (Ghssein et al., 2016; Mastropasqua et  
228 al., 2017). This system is comprised of small molecules with high zinc affinity (zincophores) that  
229 are synthesized in the cytoplasm, exported and re-internalized as a zincophore-zinc complex by  
230 a dedicated import system (Grim et al., 2020). Despite evidence that zincophore-mediated  
231 uptake systems are produced in a wide array of bacteria, zincophore biosynthetic gene cluster  
232 as well as zincophore export and import genes are absent in streptococcal genomes (Morey &  
233 Kehl-Fie, 2020). Collectively, our phenotypic characterizations and bioinformatic analysis  
234 indicate that the AdcABC transporter is the only high-affinity zinc import system of *S. mutans*.

235 As the second most abundant trace metals in the human body, zinc is also present in oral  
236 fluids and tissues, including the teeth enamel surface, dental plaque and saliva. Independent  
237 reports have shown that zinc is detected in the low micromolar range in human saliva and at  
238 much higher concentrations in dental plaque, with some studies detecting millimolar levels of  
239 zinc in plaque samples (Lynch, 2011). However, the bioavailability of zinc in saliva or in dental  
240 plaque is unknown. Our *in vivo* study indicates that zinc is not readily available in dental plaque  
241 as the ability of the  $\Delta$ *adcCB* strain to colonize the teeth of rats fed a zinc-balanced cariogenic  
242 diet was severely compromised (Fig. 6). Mammalian hosts utilize a number of mechanisms to

243 restrict zinc access for invading microbes, from zinc tissue/cell reallocation, mediated by two  
244 families of zinc transporters, to zinc sequestration/ chelation mechanisms via production of  
245 calprotectin (Zackular et al., 2015). While calprotectin can be present in oral fluids and tissues,  
246 particularly during inflammatory processes such as periodontitis, oral cancer and oropharyngeal  
247 candidiasis (Holmstrom et al., 2019; Sweet, Denbury, & Challacombe, 2001), there is no  
248 evidence of increases in salivary calprotectin levels in dental caries. Moreover, recent studies  
249 indicated that mildly acidic conditions compromise the ability of calprotectin to chelate  
250 manganese but not zinc (Rosen & Nolan, 2020). In addition, salivary glands synthesize  
251 metallothioneins, a family of low molecular weight cysteine-rich proteins that scavenge free  
252 radicals and can also chelate zinc and copper in tissues (Rahman & Karim, 2018). While the  
253 capacity of human metallothionein to restrict bacterial growth through metal sequestration is  
254 unclear, salivary metallothionein levels has been shown to increase after dental pulp injury in  
255 rats (Izumi, Eida, Matsumoto, & Inoue, 2007). To obtain preliminary insight into the host-derived  
256 zinc sequestration mechanisms in the oral cavity, we took advantage of the availability of stored  
257 saliva samples from caries-free and caries active subjects that had been previously collected for  
258 a recently completed clinical study (Garcia *et al*, manuscript in preparation), and used ELISAs to  
259 measure the levels of calprotectin and metallothionein in these samples. While calprotectin was  
260 below detection levels in most samples, there was measurable quantities of metallothionein in  
261 the saliva samples from both subject groups (Fig. S3). However, the differences in the levels of  
262 metallothionein between the two groups were not significant suggesting that metallothionein  
263 levels do not increase in response to caries. Given the very low levels of calprotectin that we  
264 found in saliva and recent observations that the manganese-binding affinity of calprotectin is  
265 compromised at low pH (Rosen & Nolan, 2020), we speculate that zinc restriction in the oral  
266 cavity is primarily mediated by metallothioneins.

267 In addition to the host-driven mechanisms of metal sequestration, bacteria in polymicrobial  
268 biofilms such as dental plaque must also compete with the other oral residents for nutrients.

269 Interestingly, a recent study showed that transcription of the *S. mutans* *adcA* and *adcB* genes  
270 was induced (about 6- and 3-fold, respectively) when *S. mutans* was co-cultured with  
271 *Streptococcus* A12, a health-associated peroxigenic oral streptococci (Kaspar, Lee, Richard,  
272 Walker, & Burne, 2020). It should be noted that, in principle, peroxigenic streptococci are better  
273 equipped to scavenge zinc than *S. mutans* due to the concerted effort of AdcAll and Pht  
274 proteins in addition to the AdcABC system. Another important aspect to consider when it comes  
275 to zinc availability is the effect of pH on trace metal solubility. At acidic pH values (pH<6), most  
276 free zinc found in saliva is in the aquated  $Zn^{2+}$  form, but it sharply decreases if the  
277 environmental pH increases above 6 (Rahman, Hossain, Pin, & Yahya, 2019). Thus, it is  
278 conceivable that as the plaque pH lowers as a result of bacterial metabolism, zinc availability to  
279 *S. mutans* might increase due to increased solubilization and concomitant reduction of acid-  
280 sensitive competitors. In addition, it is conceivable that net  $H_2O_2$  production in dental plaque due  
281 to the presence of peroxigenic oral bacteria will stimulate metallothionein synthesis by salivary  
282 glands thereby limiting the availability of free zinc in the oral cavity. Studies to determine how  
283 host-pathogen and microbe-microbe interactions influence the ability of *S. mutans* to maintain  
284 zinc homeostasis in dental plaque will soon be underway.

285 While this study focused on the bacterial zinc acquisition mechanisms, it should be noted  
286 that, similar to other trace metals, excess zinc is poisonous to microbes. In addition to being  
287 essential to all forms of life, zinc is also recognized for having antimicrobial properties and to  
288 stimulate immune cell function such that zinc-containing products have been used in wound  
289 healing, as an adjuvant for the treatment of the common cold, and as antimicrobials. In the  
290 context of oral health, zinc has been incorporated to mouthwash and toothpaste formulations to  
291 assist in the control of calculus formation, gingivitis and halitosis, while the role of zinc as an  
292 anticaries agent is controversial (Barnes, Richter, Bastin, Lambert, & Xu, 2008; Bates & Navia,  
293 1979; Giertsen, 2004; Harrap, Best, & Saxton, 1984; Li et al., 2015). Few studies have probed  
294 the consequences of high zinc concentrations to the physiology of oral streptococci, with *in vitro*

295 studies showing that high zinc concentrations inhibit their metabolism (He, Pearce, & Sissons,  
296 2002; Phan, Buckner, Sheng, Baldeck, & Marquis, 2004). Because the incorporation of zinc to  
297 routinely used oral health care products is predicted to disturb dental plaque ecology, future  
298 studies to determine the importance of environmental zinc in the caries process should also  
299 explore zinc excess conditions. From a translational standpoint, approaches to restrict the  
300 access of oral bacteria to zinc or, conversely, intoxicate them with zinc may prove effective in  
301 the control of dental caries.

302

### 303 **Experimental procedures**

#### 304 *Bacterial strains growth conditions*

305 The *S. mutans* strains used in this study are listed in Table 1. Strains were routinely grown  
306 in brain heart infusion (BHI) medium at 37°C in a 5% CO<sub>2</sub> incubator. When appropriate,  
307 spectinomycin (1 mg ml<sup>-1</sup>), kanamycin (1 mg ml<sup>-1</sup>) or erythromycin (10 µg ml<sup>-1</sup>) was added to the  
308 growth media. In addition, the chemically defined FMC medium (Terleckyj et al., 1975) was  
309 used to determine the minimal amounts of zinc that support growth of the mutant strains.  
310 Growth curves under different stress conditions and using media (BHI or FMC) with different  
311 amounts of zinc were obtained using an automated growth reader set to 37°C (Bioscreen C; Oy  
312 Growth Curves Ab, Ltd.) as described previously (Kajfasz et al., 2010). Briefly, overnight  
313 cultures grown in BHI were diluted 1:50 in to the appropriate medium in the wells of a microtiter  
314 plate with an overlay of sterile mineral oil added to each well to minimize oxidative stress.  
315 Growth in the presence of calprotectin requires the use of 38% bacterial medium and 62% CP  
316 buffer (20 mM Tris [pH 7.5], 100 mM NaCl, 3 mM CaCl<sub>2</sub>, 5 mM β-mercaptoethanol). To promote  
317 growth of *S. mutans* in the CP medium, 3X concentrated BHI medium was used in combination  
318 with the CP buffer. To determine the sensitivity of the different strains to manganese, cultures  
319 were grown in BHI to an OD<sub>600</sub> of 0.5, serially diluted and 10 µl of each dilution spotted onto BHI

320 agar supplemented with 250  $\mu$ M MnSO<sub>4</sub> with or without additional zinc (20  $\mu$ M ZnSO<sub>4</sub>). Plates  
321 were incubated for 24 hours at 37°C in a 5% CO<sub>2</sub> incubator before they were photographed.

322

### 323 *Construction of mutant strains*

324 Deletion strains lacking the *adcA*, *adcCB* or *smu2069* genes were obtained using a PCR  
325 ligation mutagenesis approach (Lau, Sung, Lee, Morrison, & Cvitkovitch, 2002). Briefly, PCR  
326 fragments flanking the region to be deleted were ligated to a nonpolar kanamycin (*adcA* and  
327 *adcCB*) or spectinomycin (*smu2069*) resistance cassette and the ligation mixture used to  
328 transform *S. mutans* UA159 according to an established protocol (Lau et al., 2002). Mutant  
329 strains were selected on BHI agar supplemented with the appropriate antibiotic and confirmed  
330 by PCR analysis and DNA sequencing. To generate complemented strains, the full length  
331 *adcRCB* operon was amplified by PCR and cloned into the integration vector pBGE (Zeng &  
332 Burne, 2009) to yield plasmid pBGE-*adcRCB*. The plasmid was propagated in *E. coli* DH10B  
333 and used to transform the *S. mutans*  $\Delta$ *adcCB* strain for integration at the *gffA* locus. All primers  
334 used in this study are listed in Table 1.

335

### 336 *ICP-MS analysis*

337 The bacterial intracellular metal content was determined using Inductively Coupled Plasma  
338 Mass Spectrometry (ICP-MS). Briefly, cultures were grown in BHI or BHI containing 6  $\mu$ M TPEN  
339 to an OD<sub>600</sub> of 0.4, harvested by centrifugation at 4°C for 15 min at 4,000 rpm, washed in  
340 phosphate-buffered saline (PBS) supplemented with 0.2 mM EDTA to chelate extracellular  
341 divalent cations followed by a wash in PBS alone. The cell pellets were resuspended in  
342 HNO<sub>3</sub> and metal composition was quantified using an Agilent 7900 ICP mass spectrometer.  
343 Metal concentrations were then normalized to total protein content as determined by the  
344 bicinchoninic acid (BCA) assay (Pierce).

345

346 *Biofilm assay*

347 The ability of the *S. mutans* strains to form biofilms on saliva-coated wells of polystyrene  
348 microtiter plates was assessed as described elsewhere (Kajfasz et al., 2020). The wells were  
349 first coated with 100  $\mu$ l of sterile clarified and pooled human saliva (IRB# 201600877) for 30  
350 min at room temperature. Strains were grown in BHI to an OD<sub>600</sub> of 0.5 and diluted 1:100 in  
351 FMC containing 1% sucrose (FMC-S) and supplemented with 5 or 20  $\mu$ M ZnSO<sub>4</sub>, and 200  $\mu$ l of  
352 each bacterial suspension added to the saliva-coated wells. After incubation at 37°C in a 5%  
353 CO<sub>2</sub> incubator for 24 hours, wells were washed twice with sterile water to remove planktonic and  
354 loosely bound bacteria, and adherent (biofilm) cells stained with 0.1% crystal violet for 15 min.  
355 The bound dye was eluted in a 33% acetic acid solution, and the total biofilm estimated by  
356 measuring the optical density of the dissolved dye at 575 nm.

357

358 *Rat tooth colonization assay*

359 The ability of the mutant strains to colonize the teeth of rats was evaluated using an  
360 established model of dental caries (Miller et al., 2015) with some modifications. Briefly, specific  
361 pathogen-free Sprague-Dawley rat pups were purchased with their dams from Jackson  
362 Laboratories and screened for the presence of mutans streptococci by plating on mitis salivarius  
363 (MS) agar upon arrival. Prior to infection, pups and dams received 0.8 mg ml<sup>-1</sup> sulfamethoxazole  
364 and 0.16 mg ml<sup>-1</sup> trimethoprim in the drinking water for 3 days to suppress endogenous flora  
365 and facilitate infection. Pups aged 15 days and dams were taken off antibiotics on day 4  
366 randomly placed into experimental groups, and infected for four consecutive days by means of  
367 cotton swab saturated with actively growing *S. mutans* UA159 or  $\Delta$ *adcBC* cultures. During the  
368 days of infection, animals were fed a 12% sucrose powdered diet (ENVIGO diet, catalog #  
369 TD.190707) and 5% (wt/vol) sterile sucrose-water *ad libitum*, and the 12% sucrose diet with  
370 sterile water in the days after infection. The experiment proceeded for 10 additional days, at the

371 end of which the animals were euthanized by CO<sub>2</sub> asphyxiation, and the lower jaws surgically  
372 removed for microbiological assessment. Jaw sonicates were subjected to 10-fold serial dilution  
373 in PBS and plated on MS agar to determine *S. mutans* counts. The number of *S. mutans*  
374 recovered from the animals was expressed as CFU ml<sup>-1</sup> of jaw sonicate. This study was  
375 reviewed and approved by the University of Florida Institutional Animal Care and Use  
376 Committee (protocol # 201810421).

377

### 378 *Statistical analysis*

379 Data were analyzed using GraphPad Prism 9.0 software unless otherwise stated.  
380 Differences in intracellular metal content and biofilm formation were determined via ordinary  
381 one-way ANOVA. The rat colonization study was subjected to the Mann-Whitney U test. In all  
382 cases, *p* values < 0.05 were considered significant.

383

### 384 **Acknowledgements**

385 Purified calprotectin was provided by Walter Chazin at Vanderbilt University. This study was  
386 supported by NIH-NIDCR award DE019783 to J.A.L.

387

### 388 **Author contributions**

389 TG, JKK, JA and JAL designed the study; TG, AMP, JKK and JA performed the experiments,  
390 TG, JKK, JA and JAL wrote the manuscript.

391



392 **References**

- 393
- 394 Archibald, F. (1986). Manganese: its acquisition by and function in the lactic acid bacteria. *Crit*
- 395 *Rev Microbiol*, 13(1), 63-109. doi:10.3109/10408418609108735
- 396 Barnes, V. M., Richter, R., Bastin, D., Lambert, P., & Xu, T. (2008). Dental plaque control effect
- 397 of a zinc citrate dentifrice. *J Clin Dent*, 19(4), 127-130.
- 398 Bates, D. G., & Navia, J. M. (1979). Chemotherapeutic effect of zinc on streptococcus mutans
- 399 and rat dental caries. *Arch Oral Biol*, 24(10-11), 799-805. doi:10.1016/0003-
- 400 9969(79)90041-4
- 401 Bayle, L., Chimalapati, S., Schoehn, G., Brown, J., Vernet, T., & Durmort, C. (2011). Zinc
- 402 uptake by *Streptococcus pneumoniae* depends on both AdcA and AdcAll and is
- 403 essential for normal bacterial morphology and virulence. *Mol Microbiol*, 82(4), 904-916.
- 404 doi:10.1111/j.1365-2958.2011.07862.x
- 405 Bersch, B., Bougault, C., Roux, L., Favier, A., Vernet, T., & Durmort, C. (2013). New insights
- 406 into histidine triad proteins: solution structure of a *Streptococcus pneumoniae* PhtD
- 407 domain and zinc transfer to AdcAll. *PLoS One*, 8(11), e81168.
- 408 doi:10.1371/journal.pone.0081168
- 409 Bowen, W. H., Burne, R. A., Wu, H., & Koo, H. (2018). Oral Biofilms: Pathogens, Matrix, and
- 410 Polymicrobial Interactions in Microenvironments. *Trends Microbiol*, 26(3), 229-242.
- 411 doi:10.1016/j.tim.2017.09.008
- 412 Brophy, M. B., Hayden, J. A., & Nolan, E. M. (2012). Calcium ion gradients modulate the zinc
- 413 affinity and antibacterial activity of human calprotectin. *J Am Chem Soc*, 134(43), 18089-
- 414 18100. doi:10.1021/ja307974e
- 415 Brown, L. R., Gunnell, S. M., Cassella, A. N., Keller, L. E., Scherkenbach, L. A., Mann, B., . . .
- 416 Thornton, J. A. (2016). AdcAll of *Streptococcus pneumoniae* Affects Pneumococcal
- 417 Invasiveness. *PLoS One*, 11(1), e0146785. doi:10.1371/journal.pone.0146785
- 418 Burcham, L. R., Le Breton, Y., Radin, J. N., Spencer, B. L., Deng, L., Hiron, A., . . . Doran, K. S.
- 419 (2020). Identification of Zinc-Dependent Mechanisms Used by Group B *Streptococcus*
- 420 To Overcome Calprotectin-Mediated Stress. *mBio*, 11(6). doi:10.1128/mBio.02302-20
- 421 Cao, K., Li, N., Wang, H., Cao, X., He, J., Zhang, B., . . . Sun, X. (2018). Two zinc-binding
- 422 domains in the transporter AdcA from *Streptococcus pyogenes* facilitate high-affinity
- 423 binding and fast transport of zinc. *J Biol Chem*, 293(16), 6075-6089.
- 424 doi:10.1074/jbc.M117.818997
- 425 Chandrangu, P., & Helmann, J. D. (2016). Intracellular Zn(II) Intoxication Leads to
- 426 Dysregulation of the PerR Regulon Resulting in Heme Toxicity in *Bacillus subtilis*. *PLoS*
- 427 *Genet*, 12(12), e1006515. doi:10.1371/journal.pgen.1006515
- 428 Fischer, F., Robbe-Saule, M., Turlin, E., Mancuso, F., Michel, V., Richaud, P., . . . Vinella, D.
- 429 (2016). Characterization in *Helicobacter pylori* of a Nickel Transporter Essential for
- 430 Colonization That Was Acquired during Evolution by Gastric *Helicobacter* Species. *PLoS*
- 431 *Pathog*, 12(12), e1006018. doi:10.1371/journal.ppat.1006018
- 432 Garcia, E. C., Brumbaugh, A. R., & Mobley, H. L. (2011). Redundancy and specificity of
- 433 *Escherichia coli* iron acquisition systems during urinary tract infection. *Infect Immun*,
- 434 79(3), 1225-1235. doi:10.1128/IAI.01222-10
- 435 Ghsein, G., Brutesco, C., Ouerdane, L., Fojcik, C., Izaute, A., Wang, S., . . . Arnoux, P. (2016).
- 436 Biosynthesis of a broad-spectrum nicotianamine-like metallophore in *Staphylococcus*
- 437 *aureus*. *Science*, 352(6289), 1105-1109. doi:10.1126/science.aaf1018
- 438 Giertsen, E. (2004). Effects of mouthrinses with triclosan, zinc ions, copolymer, and sodium
- 439 lauryl sulphate combined with fluoride on acid formation by dental plaque in vivo. *Caries*
- 440 *Res*, 38(5), 430-435. doi:10.1159/000079623

- 441 Grass, G., Wong, M. D., Rosen, B. P., Smith, R. L., & Rensing, C. (2002). ZupT is a Zn(II)  
442 uptake system in Escherichia coli. *J Bacteriol*, *184*(3), 864-866.  
443 doi:10.1128/jb.184.3.864-866.2002
- 444 Grim, K. P., Radin, J. N., Solorzano, P. K. P., Morey, J. R., Frye, K. A., Ganio, K., . . . Kehl-Fie,  
445 T. E. (2020). Intracellular Accumulation of Staphylopyne Can Sensitize Staphylococcus  
446 aureus to Host-Imposed Zinc Starvation by Chelation-Independent Toxicity. *J Bacteriol*,  
447 *202*(9). doi:10.1128/JB.00014-20
- 448 Harrap, G. J., Best, J. S., & Saxton, C. A. (1984). Human oral retention of zinc from  
449 mouthwashes containing zinc salts and its relevance to dental plaque control. *Arch Oral*  
450 *Biol*, *29*(2), 87-91. doi:10.1016/0003-9969(84)90110-9
- 451 He, G., Pearce, E. I., & Sissons, C. H. (2002). Inhibitory effect of ZnCl<sub>2</sub> on glycolysis in human  
452 oral microbes. *Arch Oral Biol*, *47*(2), 117-129. doi:10.1016/s0003-9969(01)00093-0
- 453 Holmstrom, S. B., Lira-Junior, R., Zwicker, S., Majster, M., Gustafsson, A., Akerman, S., . . .  
454 Bostrom, E. A. (2019). MMP-12 and S100s in saliva reflect different aspects of  
455 periodontal inflammation. *Cytokine*, *113*, 155-161. doi:10.1016/j.cyto.2018.06.036
- 456 Imlay, J. A. (2014). The mismetallation of enzymes during oxidative stress. *J Biol Chem*,  
457 *289*(41), 28121-28128. doi:10.1074/jbc.R114.588814
- 458 Izumi, T., Eida, T., Matsumoto, N., & Inoue, H. (2007). Immunohistochemical localization of  
459 metallothionein in dental pulp after cavity preparation of rat molars. *Oral Surg Oral Med*  
460 *Oral Pathol Oral Radiol Endod*, *104*(4), e133-137. doi:10.1016/j.tripleo.2007.04.023
- 461 Juttukonda, L. J., & Skaar, E. P. (2015). Manganese homeostasis and utilization in pathogenic  
462 bacteria. *Mol Microbiol*, *97*(2), 216-228. doi:10.1111/mmi.13034
- 463 Kajfasz, J. K., Katrak, C., Ganguly, T., Vargas, J., Wright, L., Peters, Z. T., . . . Lemos, J. A.  
464 (2020). Manganese Uptake, Mediated by SloABC and MntH, Is Essential for the Fitness  
465 of Streptococcus mutans. *mSphere*, *5*(1). doi:10.1128/mSphere.00764-19
- 466 Kajfasz, J. K., Rivera-Ramos, I., Abranches, J., Martinez, A. R., Rosalen, P. L., Derr, A. M., . . .  
467 Lemos, J. A. (2010). Two Spx proteins modulate stress tolerance, survival, and virulence  
468 in Streptococcus mutans. *J Bacteriol*, *192*(10), 2546-2556. doi:10.1128/JB.00028-10
- 469 Kaspar, J. R., Lee, K., Richard, B., Walker, A. R., & Burne, R. A. (2020). Direct interactions with  
470 commensal streptococci modify intercellular communication behaviors of Streptococcus  
471 mutans. *ISME J*. doi:10.1038/s41396-020-00789-7
- 472 Kehl-Fie, T. E., & Skaar, E. P. (2010). Nutritional immunity beyond iron: a role for manganese  
473 and zinc. *Curr Opin Chem Biol*, *14*(2), 218-224. doi:10.1016/j.cbpa.2009.11.008
- 474 Koh, E. I., Hung, C. S., Parker, K. S., Crowley, J. R., Giblin, D. E., & Henderson, J. P. (2015).  
475 Metal selectivity by the virulence-associated yersiniabactin metallophore system.  
476 *Metallomics*, *7*(6), 1011-1022. doi:10.1039/c4mt00341a
- 477 Lam, L. N., Wong, J. J., Chong, K. K. L., & Kline, K. A. (2020). Enterococcus faecalis  
478 Manganese Exporter MntE Alleviates Manganese Toxicity and Is Required for Mouse  
479 Gastrointestinal Colonization. *Infect Immun*, *88*(6). doi:10.1128/IAI.00058-20
- 480 Lau, P. C., Sung, C. K., Lee, J. H., Morrison, D. A., & Cvitkovitch, D. G. (2002). PCR ligation  
481 mutagenesis in transformable streptococci: application and efficiency. *J Microbiol*  
482 *Methods*, *49*(2), 193-205. doi:10.1016/s0167-7012(01)00369-4
- 483 Lemos, J. A., Palmer, S. R., Zeng, L., Wen, Z. T., Kajfasz, J. K., Freires, I. A., . . . Brady, L. J.  
484 (2019). The Biology of Streptococcus mutans. *Microbiol Spectr*, *7*(1).  
485 doi:10.1128/microbiolspec.GPP3-0051-2018
- 486 Li, X., Zhong, Y., Jiang, X., Hu, D., Mateo, L. R., Morrison, B. M., Jr., & Zhang, Y. P. (2015).  
487 Randomized clinical trial of the efficacy of dentifrices containing 1.5% arginine, an  
488 insoluble calcium compound and 1450 ppm fluoride over two years. *J Clin Dent*, *26*(1),  
489 7-12.
- 490 Loisel, E., Chimalapati, S., Bougault, C., Imbert, A., Gallet, B., Di Guilmi, A. M., . . . Durmort, C.  
491 (2011). Biochemical characterization of the histidine triad protein PhtD as a cell surface

- 492 zinc-binding protein of pneumococcus. *Biochemistry*, 50(17), 3551-3558.  
493 doi:10.1021/bi200012f
- 494 Loisel, E., Jacquamet, L., Serre, L., Bauvois, C., Ferrer, J. L., Vernet, T., . . . Durmort, C. (2008).  
495 AdcAll, a new pneumococcal Zn-binding protein homologous with ABC transporters:  
496 biochemical and structural analysis. *J Mol Biol*, 381(3), 594-606.  
497 doi:10.1016/j.jmb.2008.05.068
- 498 Lonergan, Z. R., & Skaar, E. P. (2019). Nutrient Zinc at the Host-Pathogen Interface. *Trends*  
499 *Biochem Sci*, 44(12), 1041-1056. doi:10.1016/j.tibs.2019.06.010
- 500 Loo, C. Y., Mitrakul, K., Voss, I. B., Hughes, C. V., & Ganeshkumar, N. (2003). Involvement of  
501 the adc operon and manganese homeostasis in *Streptococcus gordonii* biofilm  
502 formation. *J Bacteriol*, 185(9), 2887-2900. doi:10.1128/jb.185.9.2887-2900.2003
- 503 Lynch, R. J. (2011). Zinc in the mouth, its interactions with dental enamel and possible effects  
504 on caries; a review of the literature. *Int Dent J*, 61 Suppl 3, 46-54. doi:10.1111/j.1875-  
505 595X.2011.00049.x
- 506 Martin, J. E., Lisher, J. P., Winkler, M. E., & Giedroc, D. P. (2017). Perturbation of manganese  
507 metabolism disrupts cell division in *Streptococcus pneumoniae*. *Mol Microbiol*, 104(2),  
508 334-348. doi:10.1111/mmi.13630
- 509 Mastropasqua, M. C., D'Orazio, M., Cerasi, M., Pacello, F., Gismondi, A., Canini, A., . . .  
510 Battistoni, A. (2017). Growth of *Pseudomonas aeruginosa* in zinc poor environments is  
511 promoted by a nicotianamine-related metallophore. *Mol Microbiol*, 106(4), 543-561.  
512 doi:10.1111/mmi.13834
- 513 Miller, J. H., Aviles-Reyes, A., Scott-Anne, K., Gregoire, S., Watson, G. E., Sampson, E., . . .  
514 Abranches, J. (2015). The collagen binding protein Cnm contributes to oral colonization  
515 and cariogenicity of *Streptococcus mutans* OMZ175. *Infect Immun*, 83(5), 2001-2010.  
516 doi:10.1128/IAI.03022-14
- 517 Morey, J. R., & Kehl-Fie, T. E. (2020). Bioinformatic Mapping of Opine-Like Zincophore  
518 Biosynthesis in Bacteria. *mSystems*, 5(4). doi:10.1128/mSystems.00554-20
- 519 Moulin, P., Patron, K., Cano, C., Zorgani, M. A., Camiade, E., Borezee-Durant, E., . . . Hiron, A.  
520 (2016). The Adc/Lmb System Mediates Zinc Acquisition in *Streptococcus agalactiae* and  
521 Contributes to Bacterial Growth and Survival. *J Bacteriol*, 198(24), 3265-3277.  
522 doi:10.1128/JB.00614-16
- 523 Nakashige, T. G., Zhang, B., Krebs, C., & Nolan, E. M. (2015). Human calprotectin is an iron-  
524 sequestering host-defense protein. *Nat Chem Biol*, 11(10), 765-771.  
525 doi:10.1038/nchembio.1891
- 526 O'Brien, J., Pastora, A., Stoner, A., & Spatafora, G. (2020). The *S. mutans* mntE gene encodes  
527 a manganese efflux transporter. *Mol Oral Microbiol*, 35(3), 129-140.  
528 doi:10.1111/omi.12286
- 529 Ong, C. Y., Berking, O., Walker, M. J., & McEwan, A. G. (2018). New Insights into the Role of  
530 Zinc Acquisition and Zinc Tolerance in Group A Streptococcal Infection. *Infect Immun*,  
531 86(6). doi:10.1128/IAI.00048-18
- 532 Palmer, L. D., & Skaar, E. P. (2016). Transition Metals and Virulence in Bacteria. *Annu Rev*  
533 *Genet*, 50, 67-91. doi:10.1146/annurev-genet-120215-035146
- 534 Pant, S., Patel, N. J., Deshmukh, A., Golwala, H., Patel, N., Badheka, A., . . . Mehta, J. L.  
535 (2015). Trends in infective endocarditis incidence, microbiology, and valve replacement  
536 in the United States from 2000 to 2011. *J Am Coll Cardiol*, 65(19), 2070-2076.  
537 doi:10.1016/j.jacc.2015.03.518
- 538 Phan, T. N., Buckner, T., Sheng, J., Baldeck, J. D., & Marquis, R. E. (2004). Physiologic actions  
539 of zinc related to inhibition of acid and alkali production by oral streptococci in  
540 suspensions and biofilms. *Oral Microbiol Immunol*, 19(1), 31-38. doi:10.1046/j.0902-  
541 0055.2003.00109.x

- 542 Rahman, M. T., Hossain, A., Pin, C. H., & Yahya, N. A. (2019). Zinc and Metallothionein in the  
543 Development and Progression of Dental Caries. *Biol Trace Elem Res*, *187*(1), 51-58.  
544 doi:10.1007/s12011-018-1369-z
- 545 Rahman, M. T., & Karim, M. M. (2018). Metallothionein: a Potential Link in the Regulation of  
546 Zinc in Nutritional Immunity. *Biol Trace Elem Res*, *182*(1), 1-13. doi:10.1007/s12011-  
547 017-1061-8
- 548 Reyes-Caballero, H., Guerra, A. J., Jacobsen, F. E., Kazmierczak, K. M., Cowart, D., Koppolu,  
549 U. M., . . . Giedroc, D. P. (2010). The metalloregulatory zinc site in *Streptococcus*  
550 *pneumoniae* AdcR, a zinc-activated MarR family repressor. *J Mol Biol*, *403*(2), 197-216.  
551 doi:10.1016/j.jmb.2010.08.030
- 552 Rosen, T., & Nolan, E. M. (2020). Metal Sequestration and Antimicrobial Activity of Human  
553 Calprotectin Are pH-Dependent. *Biochemistry*, *59*(26), 2468-2478.  
554 doi:10.1021/acs.biochem.0c00359
- 555 Sheldon, J. R., & Skaar, E. P. (2019). Metals as phagocyte antimicrobial effectors. *Curr Opin*  
556 *Immunol*, *60*, 1-9. doi:10.1016/j.coi.2019.04.002
- 557 Subramanian Vignesh, K., & Deepe, G. S., Jr. (2016). Immunological orchestration of zinc  
558 homeostasis: The battle between host mechanisms and pathogen defenses. *Arch*  
559 *Biochem Biophys*, *611*, 66-78. doi:10.1016/j.abb.2016.02.020
- 560 Sweet, S. P., Denbury, A. N., & Challacombe, S. J. (2001). Salivary calprotectin levels are  
561 raised in patients with oral candidiasis or Sjogren's syndrome but decreased by HIV  
562 infection. *Oral Microbiol Immunol*, *16*(2), 119-123. doi:10.1034/j.1399-  
563 302x.2001.016002119.x
- 564 Terleckyj, B., Willett, N. P., & Shockman, G. D. (1975). Growth of several cariogenic strains of  
565 oral streptococci in a chemically defined medium. *Infect Immun*, *11*(4), 649-655.  
566 doi:10.1128/IAI.11.4.649-655.1975
- 567 Zackular, J. P., Chazin, W. J., & Skaar, E. P. (2015). Nutritional Immunity: S100 Proteins at the  
568 Host-Pathogen Interface. *J Biol Chem*, *290*(31), 18991-18998.  
569 doi:10.1074/jbc.R115.645085
- 570 Zackular, J. P., Knippel, R. J., Lopez, C. A., Beavers, W. N., Maxwell, C. N., Chazin, W. J., &  
571 Skaar, E. P. (2020). ZupT Facilitates *Clostridioides difficile* Resistance to Host-Mediated  
572 Nutritional Immunity. *mSphere*, *5*(2). doi:10.1128/mSphere.00061-20
- 573 Zeng, L., & Burne, R. A. (2009). Transcriptional regulation of the cellobiose operon of  
574 *Streptococcus mutans*. *J Bacteriol*, *191*(7), 2153-2162. doi:10.1128/JB.01641-08
- 575 Zhang, F., Ma, X. L., Wang, Y. X., He, C. C., Tian, K., Wang, H. G., . . . Liu, Y. Q. (2017). TPEN,  
576 a Specific Zn(2+) Chelator, Inhibits Sodium Dithionite and Glucose Deprivation (SDGD)-  
577 Induced Neuronal Death by Modulating Apoptosis, Glutamate Signaling, and Voltage-  
578 Gated K(+) and Na(+) Channels. *Cell Mol Neurobiol*, *37*(2), 235-250.  
579 doi:10.1007/s10571-016-0364-1
- 580 Zheng, B., Zhang, Q., Gao, J., Han, H., Li, M., Zhang, J., . . . Gao, G. F. (2011). Insight into the  
581 interaction of metal ions with TroA from *Streptococcus suis*. *PLoS One*, *6*(5), e19510.  
582 doi:10.1371/journal.pone.0019510  
583

585 **Table 1. Bacterial strains and primers used in the study**

| <b><i>S. mutans</i> strains</b>               | <b>Relevant characteristics</b>                       | <b>Source</b> |
|-----------------------------------------------|-------------------------------------------------------|---------------|
| UA159                                         | Wild-type                                             | ATCC          |
| $\Delta$ <i>adcA</i>                          | <i>adcA</i> ::Kan                                     | This study    |
| $\Delta$ <i>adcBC</i>                         | <i>adcCB</i> ::Kan                                    | This study    |
| $\Delta$ <i>adcBC</i> <sup>comp</sup>         | <i>adcCB</i> ::Kan, <i>adcCB</i> <sup>+</sup> in pBGE | This study    |
| $\Delta$ <i>smu2069</i>                       | <i>smu2069</i> ::Spec                                 | This study    |
| $\Delta$ <i>adcBC</i> $\Delta$ <i>smu2069</i> | <i>adcCB</i> ::Kan; <i>smu2069</i> ::Spec             | This study    |

  

| <b>Primers</b>            | <b>Sequence <sup>a</sup></b>                  | <b>Application</b>          |
|---------------------------|-----------------------------------------------|-----------------------------|
| <i>adcAdel5arm1</i>       | GCA AGA TTA CGG TAG AAG ACA                   | <i>adcA</i> deletion        |
| <i>adcAdelarm1BamHI</i>   | TGA CTA ACA GAA <u>GGG ATC CCG</u> ATA ATA AA | <i>adcA</i> deletion        |
| <i>adcAdelarm2 BamHI</i>  | CCA GCT AAG <u>GAT CCA</u> GGC CGA            | <i>adcA</i> deletion        |
| <i>adcAdel3arm2</i>       | CCC CAA AAC CCT TCA TCC                       | <i>adcA</i> deletion        |
| <i>adcCBdel5arm1</i>      | ACA AGA ATA GCG ACT GGA AA                    | <i>adcCB</i> deletion       |
| <i>adcCBdelarm1BamHI</i>  | GGA TTG ATG <u>GGG ATC CTG</u> GTG AAA        | <i>adcCB</i> deletion       |
| <i>adcCBdelarm2 BamHI</i> | GAT AAG ACC <u>GGG ATC CAA</u> CAG TAA TG     | <i>adcCB</i> deletion       |
| <i>adcCBdel3arm2</i>      | CCC ATG TCA TTA CTG TCC C                     | <i>adcCB</i> deletion       |
| <i>adcCBcompXbaI5'</i>    | <u>GCTCTAGACTTTGAAATCTTACCTTATCGTTGC</u>      | $\Delta$ <i>adcCB</i> comp. |
| <i>adcCBcompBsrG3'</i>    | CGCT <u>GTACACTGTCTTTTCCCAGCCTC</u>           | $\Delta$ <i>adcCB</i> comp. |
| <i>smu2069del5arm1</i>    | GGTTCTCCCTTACGGTCACGC                         | <i>smu2069</i> deletion     |
| <i>smu2069delarm1SphI</i> | CCAGCAAG <u>CATGCGAGCAGTAAGTATAAAGGCA</u>     | <i>smu2069</i> deletion     |
| <i>smu2069delarm2SphI</i> | GGAGTT <u>GCATGCATTTCTGGTATGCTTATCATGG</u>    | <i>smu2069</i> deletion     |
|                           | CTG                                           |                             |
| <i>smu2069del3arm2</i>    | GCTGCAATTCCGAGGTTCTTCC                        | <i>smu2069</i> deletion     |

586 <sup>a</sup> Restriction sites are underlined.

587 **FIGURE LEGENDS**

588 **Figure 1.** Genetic organization of the *adcABC* genes and other known zinc import systems in  
589 selected gram-positive bacteria.

590

591 **Figure 2.** Alignment of AdcA of *S. mutans* with AdcA and AdcAll proteins of *S. agalactiae*. Dark  
592 and light grey shades represent identical and similar residues, respectively. Orange shaded  
593 residues are the N-terminal histidine rich metal-binding motif, yellow boxed residues depict the  
594 C-terminal ZinT domain while the glutamic acid and additional histidine residues that aid in  
595 metal recruitment are indicated in blue shades.

596

597 **Figure 3.** AdcABC mediates the growth of *S. mutans* under zinc-depleted conditions. Growth  
598 curves of UA159,  $\Delta adcA$ ,  $\Delta adcCB$  or  $\Delta adcCB^{comp}$  in (A) FMC, (B) FMC supplemented with 5  $\mu M$   
599  $ZnSO_4$ , (C) BHI, (D) CP/BHI medium containing 200  $\mu g\ ml^{-1}$  of human calprotectin, and (E) BHI  
600 containing 10  $\mu M$  TPEN. Curves shown represent average and standard deviation of at least  
601 five independent biological replicates.

602

603 **Figure 4.** ICP-MS quantifications of intracellular zinc and manganese in the UA159,  $\Delta adcA$ ,  
604  $\Delta adcCB$  or  $\Delta adcCB^{comp}$  strains. The bar graphs indicate zinc or manganese levels in cells grown  
605 in BHI (A and C) or BHI containing 6  $\mu M$  TPEN (B and D). Data represent averages and  
606 standard deviations of three independent biological replicates. One-way ANOVA was used to  
607 compare the metal content of mutants and UA159 (\*) and between  $\Delta adcBC$  and  $\Delta adcCB^{comp}$  (#).  
608 A *p* value <0.05 was considered significant.

609

610 **Figure 5.** The  $\Delta adcCB$  was hypersensitive to manganese. Mid-log grown cultures of UA159,  
611  $\Delta adcCB$  or  $\Delta adcCB^{comp}$  were serially diluted and spotted on BHI agar containing different  
612 concentrations of manganese or zinc as indicated in the figure labels.

613

614 **Figure 6.** Colonization of *S. mutans* UA159 or  $\Delta adcBC$  on the teeth of rats. (A) Total *S. mutans*  
615 colonies recovered from rat jaws by plating on MSB agar, and (B) percentage of *S. mutans*  
616 colonies among total recovered flora plated on blood agar plates shown as violin plots. (\*)  
617 Indicates statistical significance ( $p = 0.0003$  (A) and  $0.0002$  (B) by Mann-Whitney U test).

618

619 **Figure 7.** Expression of virulence-related attributes in the UA159,  $\Delta adcA$  and  $\Delta adcCB$  strains.  
620 (A) Growth in in the presence of a sub-inhibitory concentration of  $H_2O_2$  (0.75 mM) in FMC  
621 supplemented with 5  $\mu M$  (A) or 20  $\mu M$   $ZnSO_4$  (B). Curves shown represent average and  
622 standard deviation of at least five independent biological replicates. (C) 24-h biofilms formed on  
623 the surface of saliva-coated microtiter plate wells form cells grown in FMC supplemented with  
624 1% sucrose in presence of varying amount of Zn. (\*) Indicates statistical significance when  
625 compared to UA159 strain ( $p < 0.05$ , one-way ANOVA).

626

Figure 1

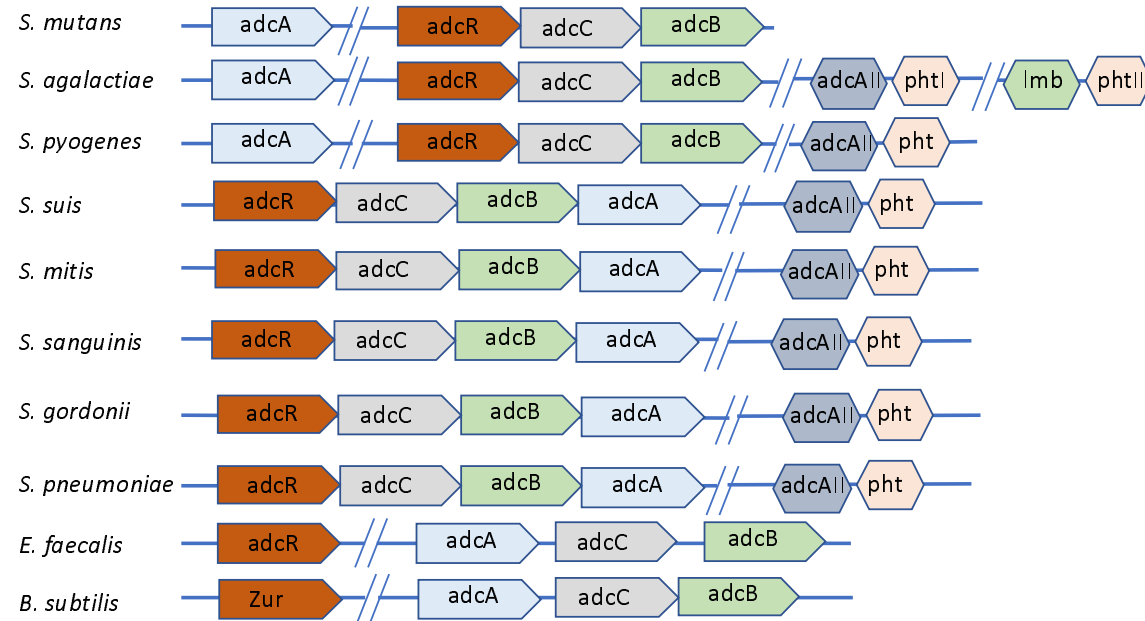



# Figure 2

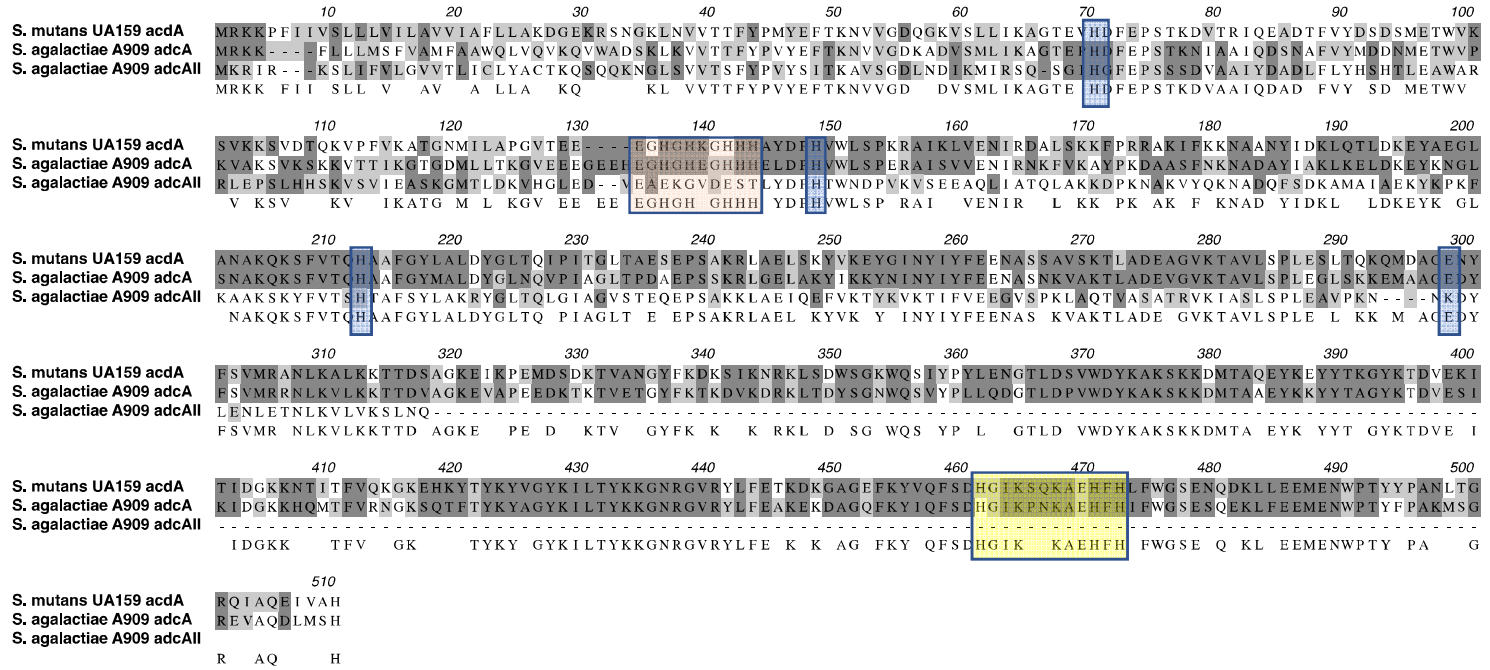

Figure 3

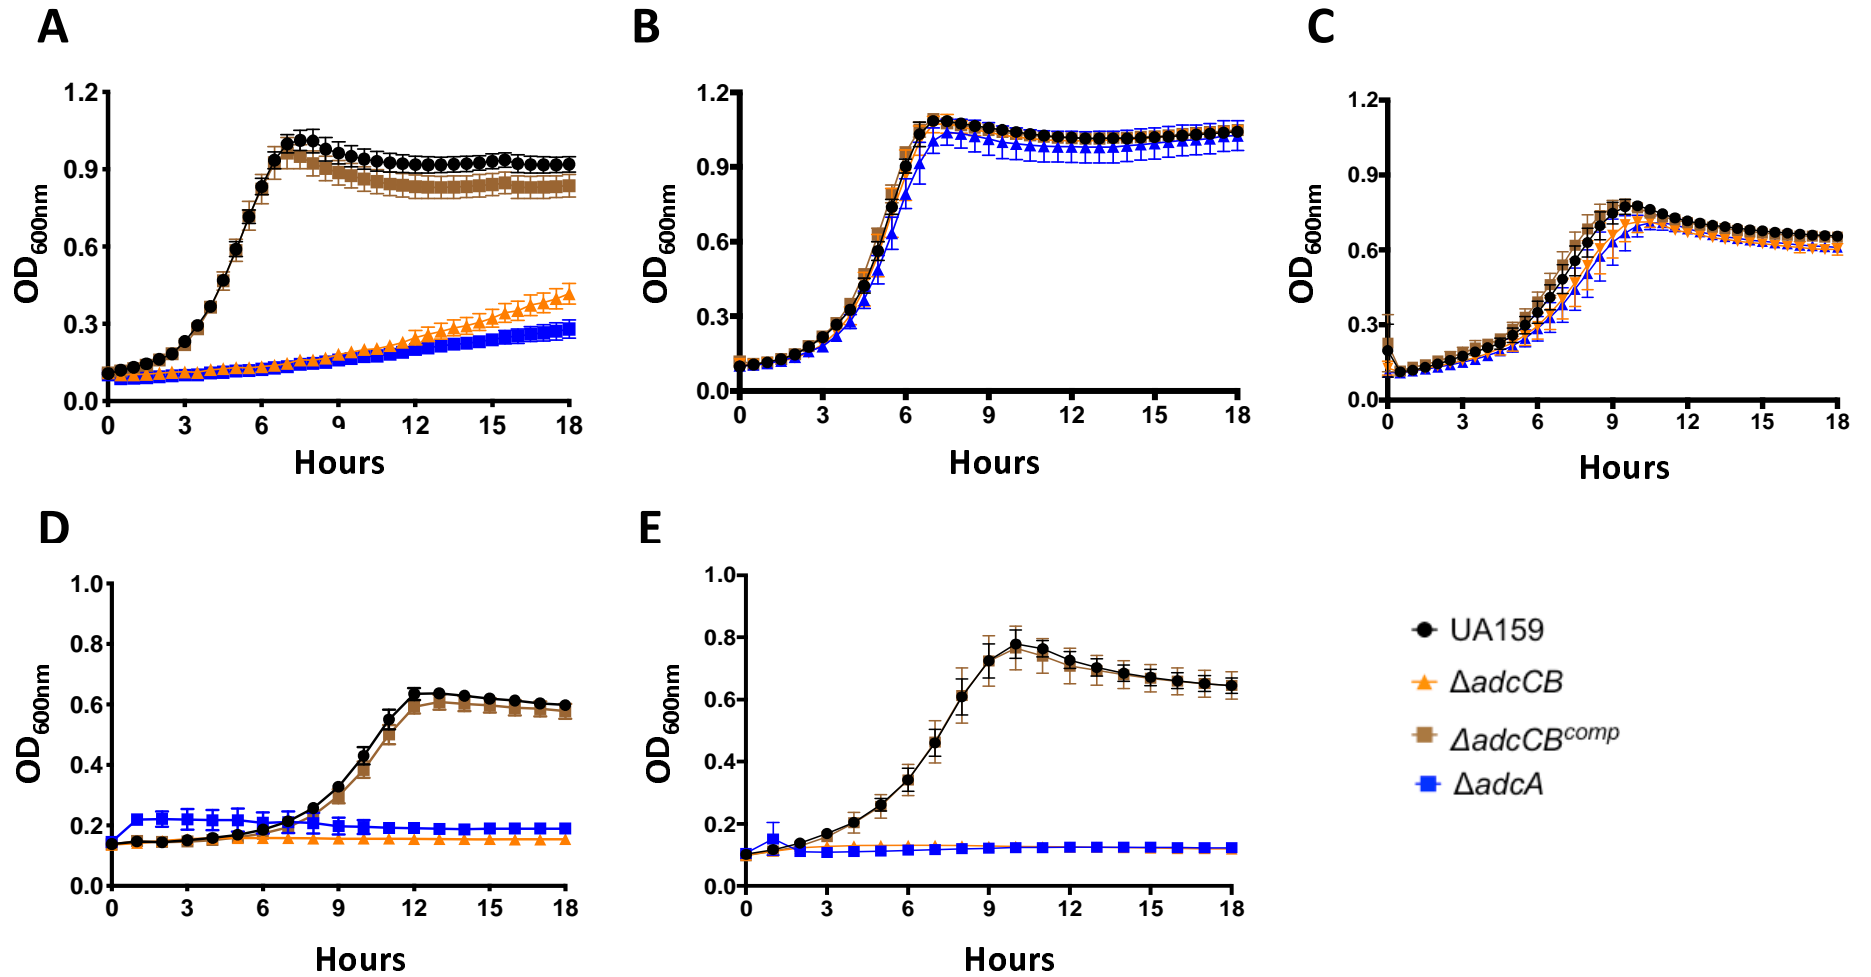

Figure 4

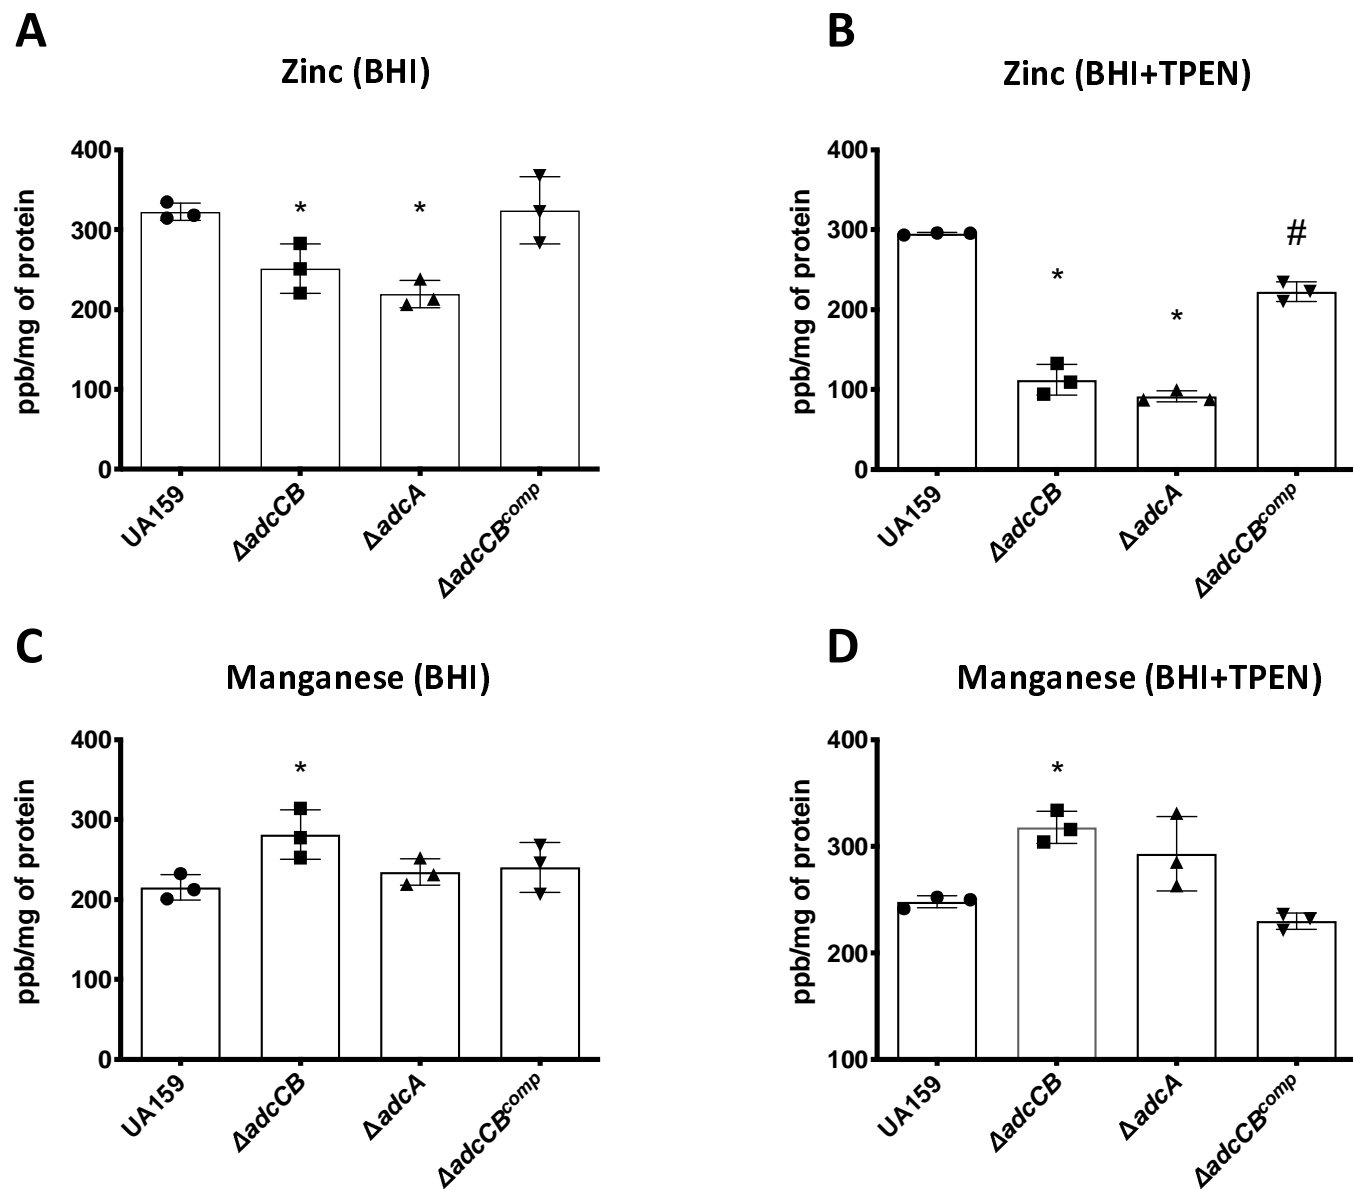

Figure 5

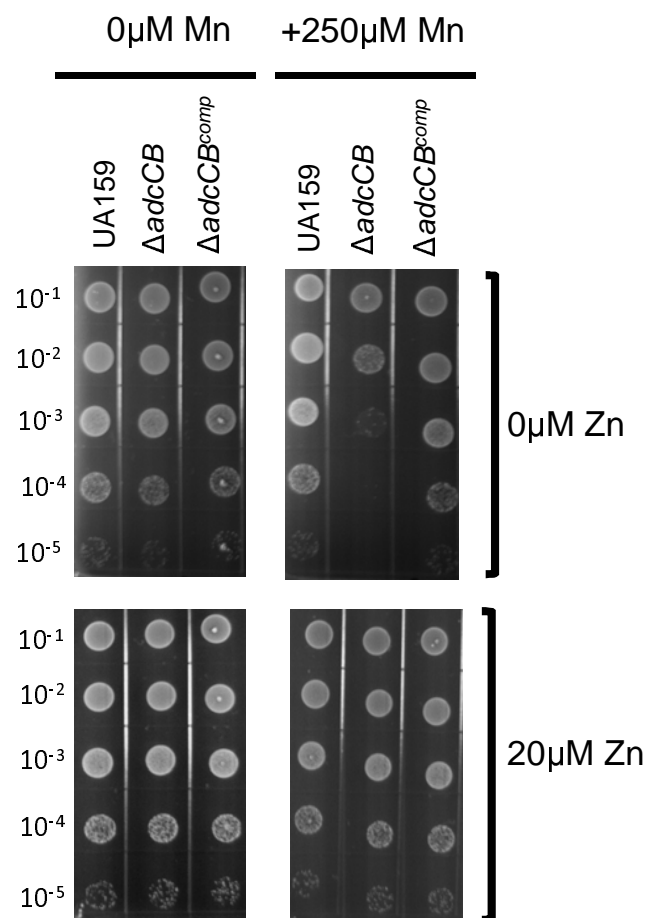

Figure 6

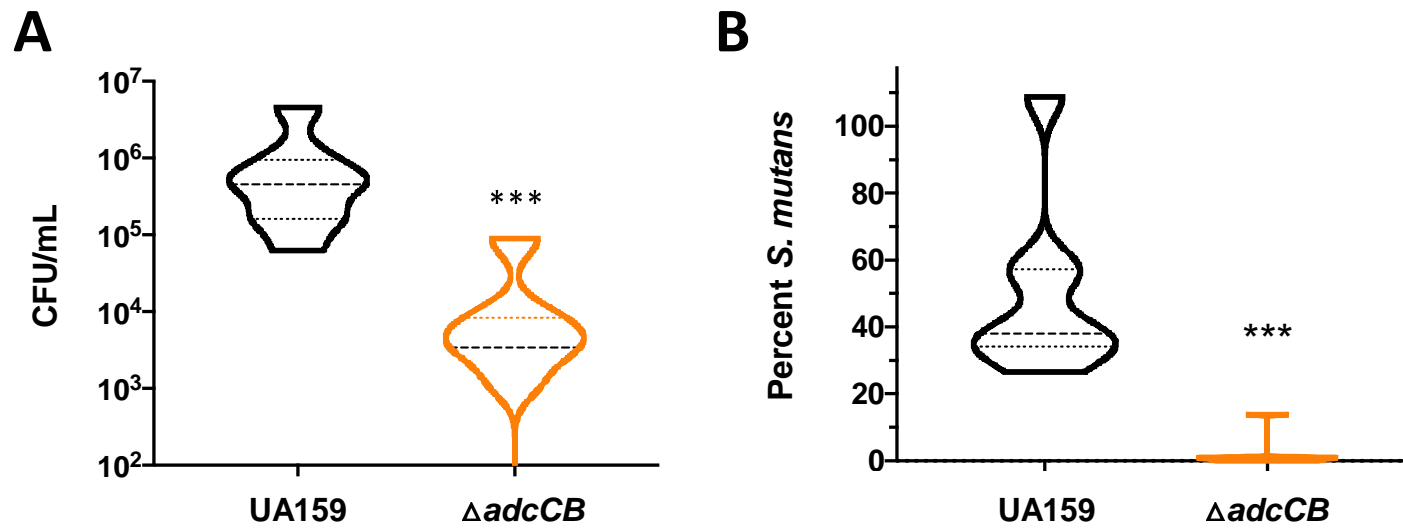

Figure 7

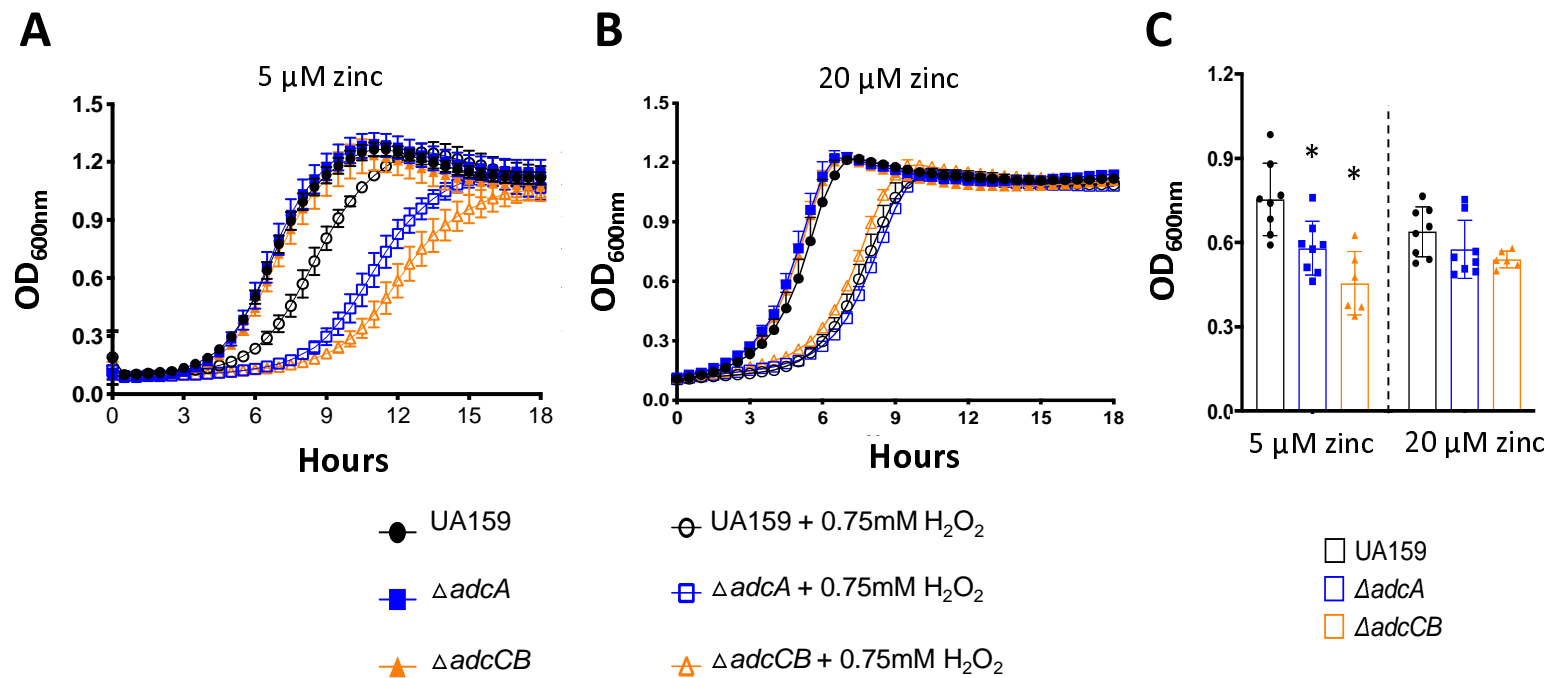

# Figure S1

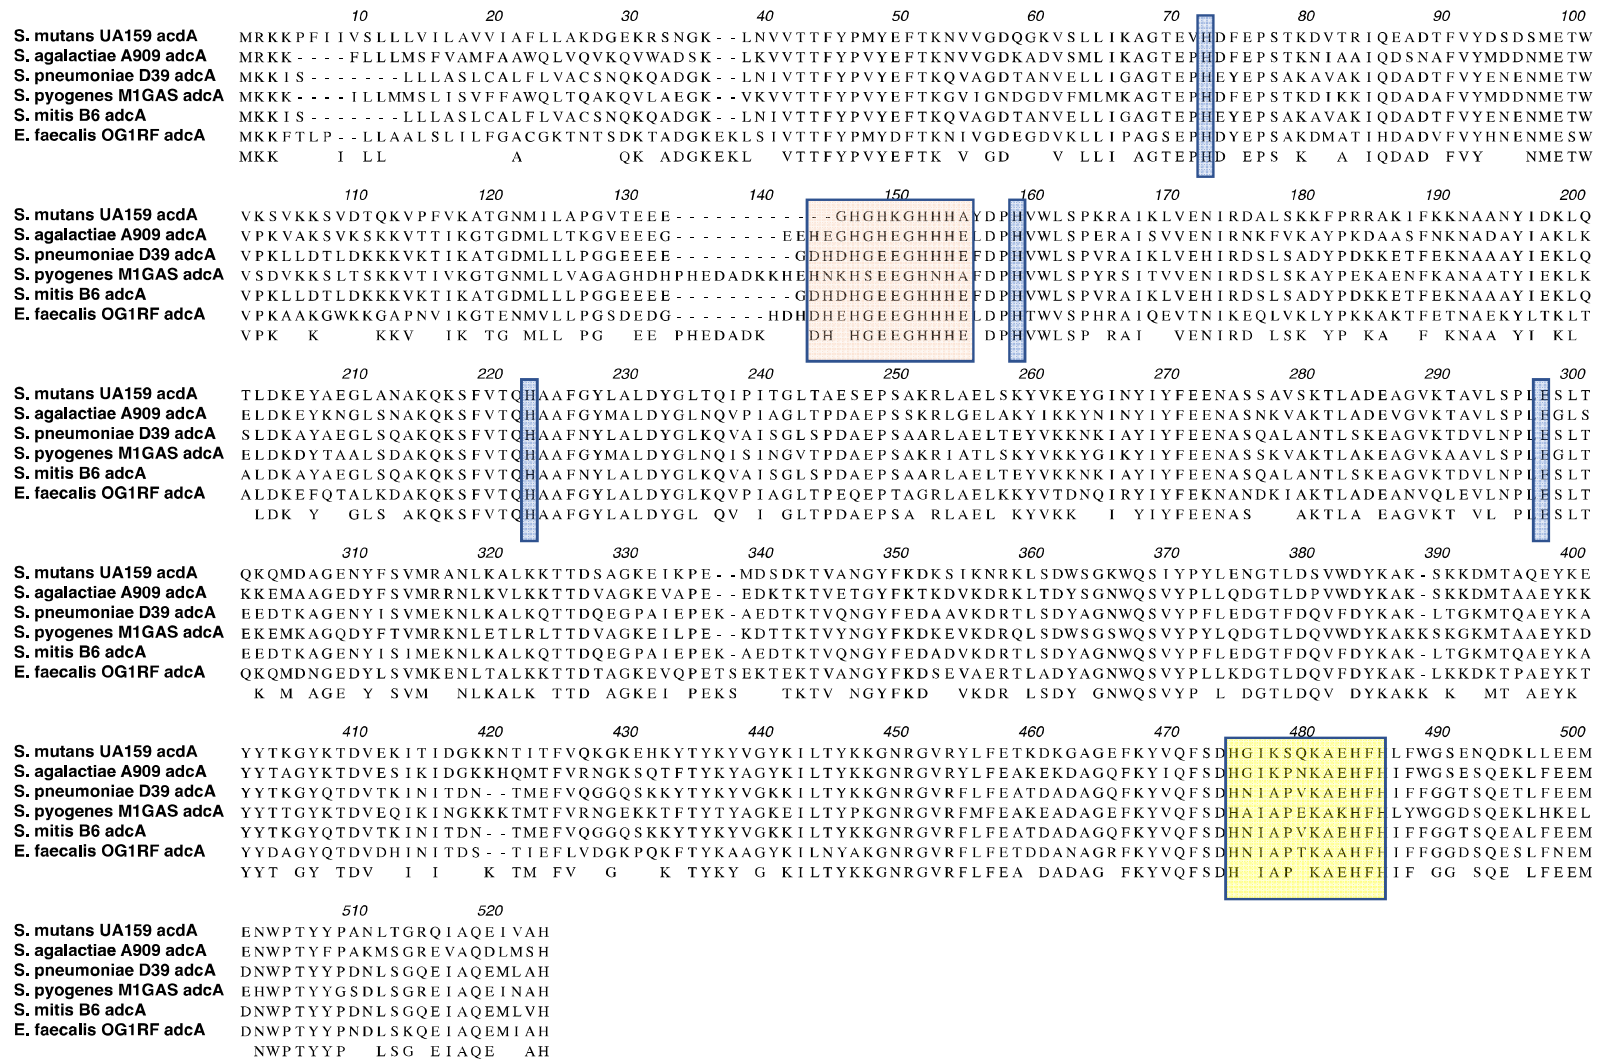

**Figure S1.** Amino acid alignment of several AdcA proteins from several streptococci and *E. faecalis*. Orange shaded residues are the N-terminal histidine rich metal-binding motif, yellow boxed residues depict the C-terminal ZinT domain, the glutamic acid and additional histidine residues that aid in metal recruitment are indicated in blue shades.

Figure S2

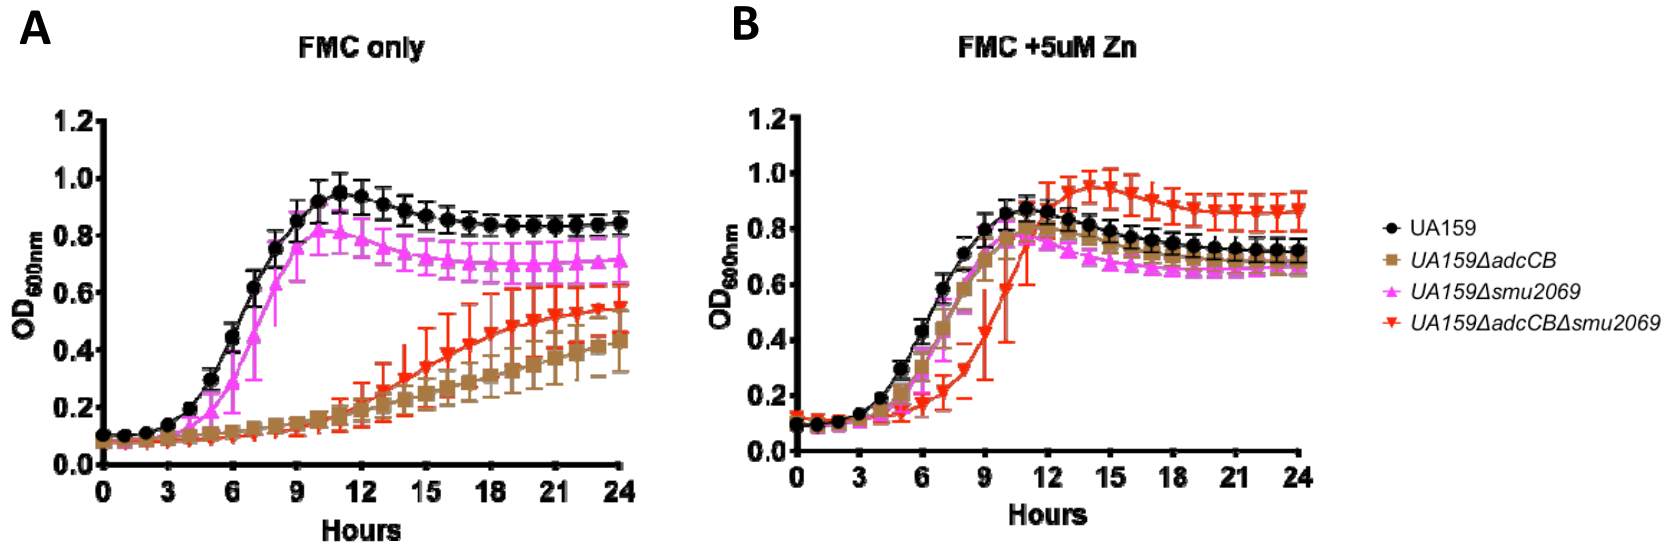

Figure S2. Growth of the *S. mutans* UA159, Δ*adcCB*, Δ*smu2069*, or Δ*adcCB*Δ*smu2069* strains in (A) FMC or (B) FMC supplemented with 5 μM zinc.



**Figure S3**

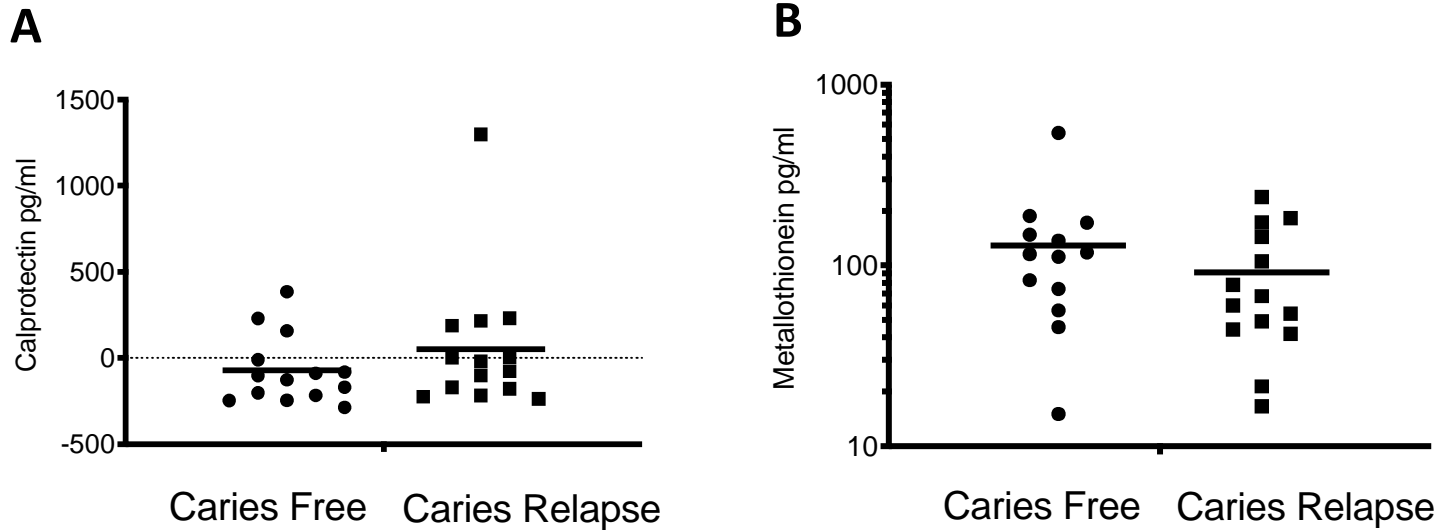

**Figure S3.** Salivary levels of calprotectin (A) and metallothionein (B) in human saliva determined by ELISA.
